# Supplementary material
Source: publisher figshare collection journal article supplement (https://tandf.figshare.com/ndownloader/files/22773872)
Supplement: Supplementary file 1 [file 22773872]

**SUPPLEMENTARY MATERIAL**

**Synthesis and *in vitro* anticancer activities of biotinylated derivatives of glaucocalyxin A and oridonin**

Xiao-Lei Huang a#, Jing-Lei Chen a#, Xian-Lun Li a, Lei Zhao a, Ya-Dong Cui a, Jiang-Yun Liu a, Susan L. Morris-Natschke b, Goto Masuo b, Yung-Yi Cheng b, Kuo-Hsiung Lee bc*, Dao-Feng Chen d* and Jian Zhang a*

a College of Pharmaceutical Science, Soochow University, Suzhou 215123, China

b Natural Products Research Laboratories, UNC Eshelman School of Pharmacy, University of North Carolina, Chapel Hill, North Carolina 27599, United States

c Chinese Medicine Research and Development Center, China Medical University and Hospital, Taichung 20277, Taiwan

d Department of Pharmacognosy, School of Pharmacy, Fudan University, Shanghai 201203, China

*Corresponding author: jianzhang@suda.edu.cn (Jian Zhang); [dfchen@shmu.edu.cn](http://mail.suda.edu.cn/coremail/XJS/pab/view.jsp?sid=BAmeVyppDFMSEcDnHtppPTZelDpQmkNZ&totalCount=137&view_no=40&puid=60&gid=) (Dao-Feng Chen); khlee@unc.edu (Kuo-Hsiung Lee).

Compound **1**, a white powder, 270 mg, yield 75.6%, HRESIMS: *m/z* 358.1791 [M+H]+ (calcd for C16H28N3O4S, 358.1756). 1H NMR (600 MHz, DMSO-*d6*) *δ*: 7.71 (1 H, s), 6.39 (1 H, s), 6.33 (1 H, s), 4.29 (1 H, t, *J* = 6.4 Hz), 4.10-4.11 (1 H, m), 3.06-3.08 (1 H, m), 3.00 (2 H, dd, *J* = 12.5, 6.3 Hz), 2.81 (1 H, dd, *J* = 12.4, 4.9 Hz), 2.56 (1 H, d, *J* = 12.4 Hz), 2.18 (2 H, t, *J* = 7.3 Hz), 2.03 (2 H, t, *J* = 7.3 Hz), 1.66-1.22 (12 H, m). 13C NMR (150 MHz, DMSO-*d*6) *δ*: 174.9, 172.2, 163.1, 61.5, 59.6, 55.9, 38.7, 35.6, 34.1, 29.3, 28.7, 28.5, 26.4, 25.8, 24.7.

Compound **2**, a white powder, 340 mg, yield 72.2%. HRESIMS: *m/z* 471.2655 [M+H]+ (calcd for C22H39N4O5S, 471.2596). 1H NMR (500 MHz, DMSO-*d6*) *δ*: 7.67 (1 H, s), 7.66 (1 H, s), 6.36 (1 H, s), 6.30 (1 H, s), 4.25 (1 H, s), 4.07 (1 H, s), 3.03 (1 H, s), 2.94 (4 H, d, *J* = 5.3 Hz), 2.72 (1 H, dd, *J* = 12.2, 4.5 Hz), 2.53 (1H, d, *J* = 12.4 Hz), 2.14 (2 H, t, *J* = 6.9 Hz), 1.98 (4 H, d, *J* = 7.3Hz), 1.54-1.16 (20 H, m). 13C NMR (125 MHz, DMSO-*d*6) *δ*: 174.9, 172.3×2, 163.2, 61.5, 59.6, 55.8, 40.2, 38.8, 38.7, 35.8, 35.7, 29.4, 29.3, 28.6, 28.4, 26.5, 26.4, 25.7, 25.5, 24.6.

Compound **3**, a white powder, 465 mg, yield 62.4%. HRESIMS: *m/z* 364.1336 [M+H]+ (calcd for C17H22N3O4S, 364.1286). 1H NMR (600 MHz, DMSO-*d6*) *δ*: 12.90 (1 H, brs), 10.05 (1 H, s), 8.22 (1 H, brs), 7.81 (1 H, dd, *J* = 8.1, 1.0 Hz), 7.58 (1 H, m), 7.40 (1 H, t, *J* = 7.9 Hz), 6.45 (1 H, s), 6.36 (1 H, s), 4.30 (1 H, dd, *J* = 7.7, 4.9 Hz), 4.14 (1 H, dd, *J* = 7.6, 4.4 Hz), 3.12-3.14 (1 H, m), 2.82 (1 H, dd, *J* = 12.5, 5.2 Hz), 2.58 (1 H, d, *J* = 12.4 Hz), 2.31-2.33 (2 H, m), 1.68-1.33 (6 H, m). 13C NMR (150 MHz, DMSO-*d*6) *δ*: 171.9, 167.7, 163.2, 140.0, 131.7, 129.4, 124.2, 123.6, 120.2, 61.5, 59.7, 55.9, 40.3, 36.7, 28.7, 28.6, 25.5.

Compound **4a**, a white powder, 483 mg, yield 64.9%. HRESIMS: *m/z* 364.1313 [M+H]+ (calcd for C17H22N3O4S, 364.1286). 1H NMR (500MHz, DMSO-*d6*) *δ*: 10.14 (1 H, s), 7.82 (2 H, d, *J* = 8.7 Hz), 7.65 (2 H, d, *J* = 8.7 Hz), 6.40 (1 H, s), 6.32 (1 H, s), 4.25 (1 H, dd, *J* = 7.3, 5.3 Hz), 4.09 (1 H, dd, *J* = 7.5, 4.4 Hz), 3.06-3.08 (1 H, m), 2.77 (1 H, dd, *J* = 12.5, 5.1 Hz), 2.53 (1 H, d, *J* = 12.4 Hz), 2.30 (2 H, t, *J* = 6.9 Hz), 1.64-1.26 (6 H, m). 13C NMR (125 MHz, DMSO-*d*6) *δ*: 171.7, 166.9, 162.8, 143.4, 130.4×2, 124.8. 118.3×2, 61.1, 59.2, 55.4, 39.9, 36.3, 28.2, 28.1, 25.0.

Compound **4b**, awhite powder, 600 mg, yield 77.6%. HRESIMS: *m/z* 378.1493 [M+H]+ (calcd for C18H24N3O4S, 378.1443). 1H NMR (600 MHz, DMSO-*d6*) *δ*: 9.34 (1 H, s), 7.75 (1 H, s), 7.71 (1 H, d, *J* = 8.4 Hz), 7.76 (1 H, d, *J* = 8.3 Hz), 6.43 (1 H, brs), 4.30 (1 H, t, *J* = 6.5 Hz), 4.13 (1 H, t, *J* = 4.7 Hz), 3.11-3.13 (1 H, m), 2.82 (1 H, dd, *J* = 12.3, 5.0 Hz), 2.58 (1 H, d, *J* = 12.4 Hz), 2.38 (2 H, t, *J* = 7.0 Hz), 2.24 (3 H, s), 1.67-1.36 (6 H, m). 13C NMR (150 MHz, DMSO-*d*6) *δ*: 171.5, 167.1, 162.8, 140.8, 131.5, 130.5, 127.3, 126.5, 123.7, 61.1, 59.3, 55.5, 39.9, 35.8, 28.3, 28.1, 25.3, 18.0.

Compound **4c**, a white powder, 465 mg, yield 62.4%. 1H NMR (400 MHz, DMSO-d6) *δ*: 12.92 (1 H, s), 9.95 (1H, s), 8.21 (1 H, s), 7.76 (2 H, brs), 6.50 (1 H, s), 6.42 (1 H, s), 4.34 (1 H, s), 4.17 (1 H, s), 3.15 (1 H, s), 2.85 (1 H, s), 2.63-2.47 (3 H, m), 1.65-1.40 (6 H, m). 13C NMR (100 MHz, DMSO-*d*6) *δ*: 174.5, 172.2, 166.1, 162.8, 130.9, 126.6, 126.7, 125.9, 116.1, 61.1, 59.3, 55.4, 39.9, 35.8, 28.2, 28.1, 25.0.

Compound **5**: a white powder, 280 mg, yield 50.2%. HRESIMS: *m/z* 559.2843 [M+H]+ (calcd for C30H43N2O6S, 559.2842). 1H NMR (600 MHz, DMSO-*d6*) *δ*: 6.40 (1 H, s), 6.35 (1 H, s), 5.96 (1 H, s), 5.85 (1 H, s), 5.46 (1 H, s), 4.41 (1 H, d, *J* = 4.3 Hz), 4.31 (1 H, t, *J* = 5.8 Hz), 4.10-4.13 (2 H, m), 3.93-3.95 (1 H, m), 3.08-3.10 (1 H, m), 3.03 (1 H, s), 2.83 (1 H, dd, *J* = 12.4, 5.1 Hz), 2.58 (1 H, d, *J* = 12.4 Hz), 2.47-2.49 (1 H, m), 2.41-2.43 (1 H, m), 1.12 (3 H, s), 1.01 (3 H, s), 0.96 (3 H, s). 13C NMR (150MHz, DMSO-*d*6) *δ*: 216.1, 205.5, 172.6, 162.7, 147.0, 116.3, 74.2, 70.9, 61.3, 61.0, 59.2, 55.4, 53.9, 50.6, 48.6, 46.1, 43.7, 39.8, 38.4, 37.3, 33.8, 33.4, 31.9, 28.9, 28.0, 26.9, 24.0, 20.7, 17.8, 17.5.

Compound **6**: a white powder, 101 mg, yield 18.1%. HRESIMS: *m/z* 559.2842 [M+H]+ (calcd for C30H43N2O6S, 559.2847). 1H NMR (600 MHz, DMSO-*d6*) *δ*: 7.95 (1 H, brs), 6.38 (1 H, s), 6.35 (1 H, s), 5.93 (1 H, s), 5.40 (1 H, s), 5.13 (1 H, dd, *J* = 10.6, 5.2 Hz), 4.69 (1 H, s), 4.35 (1 H, s), 4.31 (1 H, t, *J* = 4.9 Hz), 3.09 (1 H, dd, *J* = 12.1, 7.6 Hz), 2.98 (1 H, s), 2.83 (1 H, dd, *J* = 12.4, 5.1 Hz), 2.59-2.61 (1 H, m), 2.58 (1 H, d, *J* = 12.3 Hz), 2.32-2.33 (1 H, m), 2.19 (2 H, t, *J* = 7.4 Hz), 1.02 (3 H, s), 0.99 (3 H, s), 0.95 (3 H, s). 13C NMR (150 MHz, DMSO-*d*6) *δ*: 216.5, 205.8, 172.1, 163.1, 148.0, 117.2, 74.5, 73.1, 61.6, 61.4, 59.6, 55.8, 53.3, 50.6, 46.3, 46.1, 40.3, 38.9, 37.6, 36.2, 34.2, 33.7, 31.5, 28.4, 28.2, 27.7, 24.8, 21.0, 18.7, 18.2.

Compound **7**: a white powder, 251 mg, yield 18.0%. HRESIMS: *m/z* 672.3700 [M+H]+ (calcd for C36H54N3O7S, 672.3638). 1H NMR (600 MHz, DMSO-*d6*) *δ*: 7.70 (1 H, t, *J* = 5.5 Hz), 6.41 (1 H, s), 6.34 (1 H, s), 5.95 (1 H, s), 5.84 (1 H, s), 5.46 (1 H, s), 4.40 (1 H, d, *J* = 4.3 Hz), 4.31 (1 H, t, *J* = 7.1 Hz), 4.12-4.14 (1 H, m), 4.05-4.07 (1 H, m), 3.93-3.95 (1 H, m), 3.18 (1 H, t, *J* = 10.3 Hz), 3.09-3.11 (1 H, m), 3.02 (1 H, s), 2.82 (1 H, dd, *J* = 12.4, 5.1 Hz), 2.58 (1 H, d, *J* = 12.4 Hz), 2.46-2.48 (1 H, m), 2.39-2.41 (1 H, m), 1.11 (3 H, s), 1.01 (3 H, s), 0.95 (3 H, s). 13C NMR (150 MHz, DMSO-*d*6) *δ*: 216.1, 205.5, 172.6, 171.8, 162.7, 147.0, 116.3, 74.2, 70.9, 61.3, 61.0, 59.2, 55.4, 53.9, 50.6, 48.6, 46.1, 43.7, 39.9, 38.4, 38.3, 37.3, 35.2, 33.9, 33.4, 31.9, 28.9, 28.2, 28.0, 26.9, 25.9, 25.3, 23.7, 20.7, 17.8, 17.5.

Compound **8**: a white powder, 121 mg, yield 37.4%. HRESIMS: *m/z* 672.3692 [M+H]+ (calcd for C36H54N3O7S, 672.3638). 1H NMR (600 MHz, DMSO-*d6*) *δ*: 7.70 (1 H, t, *J* = 5.5 Hz), 6.41 (1 H, s), 6.35 (1 H, s), 5.92 (1 H, s), 5.40 (1 H, s), 5.13 (1 H, dd, *J* = 10.5, 5.5 Hz), 4.69 (1 H, s), 4.36 (1 H, d, *J* = 2.0 Hz), 4.31 (1 H, t, *J* = 7.2 Hz), 4.13 (1 H, t, *J* = 4.8 Hz), 3.09-3.11 (1 H, m), 2.98-2.99 (1 H, m), 2.83 (1 H, dd *J* = 12.5, 5.1 Hz), 2.60-2.62 (1 H, m), 2.59 (1 H, d, *J* = 11.9 Hz), 2.33-2.35 (1 H, m), 2.16-2.19 (2 H, m), 1.03 (3 H, s), 0.99 (3 H, s), 0.95 (3 H, s). 13C NMR (150 MHz, DMSO-*d*6) *δ*: 216.5, 205.8, 172.2, 172.1, 163.1, 148.0, 117.1, 74.6, 73.1, 61.6, 61.5, 59.6, 55.9, 53.3, 50.6, 46.3, 46.1, 40.5, 38.9, 38.7, 37.6, 35.7, 34.3, 33.7, 31.5, 29.3, 28.7, 28.5, 27.7, 26.2, 26.1, 25.8, 24.5, 21.0, 18.7, 18.2.

Compound **9**: a white powder, 110 mg, yield 13.4%. HRESIMS: *m/z* 785.4528 [M+H]+ (calcd for C42H65N4O8S, 785.4487). 1H NMR (600 MHz, DMSO-*d6*) *δ*: 7.72 (1 H, t, *J* = 5.6 Hz), 7.68 (1 H, t, *J* = 5.5 Hz), 6.39 (1 H, s), 6.33 (1 H, s), 5.94 (1 H, s), 5.83 (1 H, s), 5.44 (1 H, s), 4.39 (1 H, d, *J* = 4.3 Hz), 4.30 (1 H, t, *J* = 7.4 Hz), 4.12-4.07 (2 H, m), 3.91-3.93 (1 H, m), 3.08-3.10 (1 H, m), 3.01 (1 H, s), 2.82 (1 H, dd *J* = 12.4, 5.1 Hz), 2.57 (1 H, d, *J* = 12.4 Hz), 2.46-2.47 (1 H, m), 2.39-2.41 (1 H, m), 1.10 (3 H, s), 1.00 (3 H, s), 0.94 (3 H, s). 13C NMR (150 MHz, DMSO-*d*6) *δ*: 216.6, 206.0, 173.1, 172.3×2, 147.5, 116.8, 74.6, 71.4, 61.8, 61.5, 59.7, 55.9, 54.3, 51.0, 49.0, 46.5, 44.1, 40.2, 38.8×2, 38.7, 37.7, 35.8, 35.7, 34.3, 33.9, 32.3, 29.4, 29.3×2, 28.7, 28.5, 27.4, 26.6, 26.3, 25.8, 25.5, 24.1, 21.1, 18.3, 17.9.

Compound **10**: a white powder, 105 mg, yield 14.0%. HRESIMS: *m/z* 785.4540 [M+H]+ (calcd for C42H65N4O8S, 785.4487). 1H NMR (600 MHz, DMSO-*d6*) *δ*: 7.72 (1H, t, *J* = 5.5 Hz), 7.68 (1H, t, *J* = 5.4 Hz), 6.41 (1 H, s), 6.34 (1 H, s), 5.92 (1 H, s), 5.39 (1 H, s), 5.12 (1 H, dd, *J* = 10.4, 5.6 Hz), 4.69 (1 H, s), 4.35 (1 H, d, *J* = 2.2 Hz), 4.31 (1 H, t, *J* = 7.4 Hz), 4.13 (1H, t, *J* = 4.8 Hz), 3.11 (1 H, m), 2.83 (1 H, dd, *J* =12.4, 5.1 Hz), 2.60~2.56 (2 H, m), 2.17 (2 H, m), 1.02 (3 H, s), 0.99 (3 H, s), 0.95 (3 H, s). 13C NMR (150 MHz, DMSO-*d*6) *δ*: 216.5, 205.8, 172.2, 172.1, 163.1, 148.0, 117.1, 74.6, 73.1, 61.6, 61.5, 59.6, 55.9, 53.3, 50.6, 49.0, 46.3, 46.1, 40.3, 38.9, 38.8, 38.7, 37.6, 35.8, 35.7, 34.3, 33.7, 31.5, 29.4, 29.3, 28.7, 28.5, 27.7, 26.6, 26.2, 26.1, 25.8, 25.5, 24.5, 21.0, 18.7, 18.2.

Compound **11**: a white powder, 94 mg, yield 13.9%. HRESIMS: *m/z* 678.3222 [M+H]+ (calcd for C37H48N3O7S, 678.3168). 1H NMR (600 MHz, DMSO-*d6*) *δ*: 10.04 (1 H, s), 8.02 (1 H, s),7.83 (1 H, d, *J* = 8.2 Hz), 7.45 (1 H, d, *J* = 7.7 Hz), 7.35 (1 H, t, *J* = 7.9 Hz), 6.42 (1 H, s), 6.35 (1 H, s), 6.09 (1 H, s), 6.04 (1 H, s), 5.53 (1 H, s), 4.36 (1 H, d, *J* = 4.2 Hz), 4.31 (1 H, t, *J* = 7.3 Hz), 4.14 (1 H, dd, *J* = 10.4, 5.0 Hz), 3.97 (1 H, m), 3.18 (1 H, s), 3.12 (1 H, m), 2.83 (1 H, dd, *J* = 12.5, 5.1 Hz), 2.59 (1 H, d, *J* = 12.4 Hz), 2.44 (1 H, m), 2.31 (2 H, m), 2.17 (1 H, m), 1.19 (3 H, s), 1.02 (3 H, s), 0.99 (3 H, s). 13C NMR (150 MHz, DMSO-*d*6) *δ*: 216.1, 205.4, 171.4, 165.5, 162.7, 147.0, 139.2, 131.2, 128.6, 124.0, 123.1, 119.8, 116.5, 75.3, 71.0, 61.5, 61.0, 59.2, 55.4, 54.0, 50.6, 46.1, 43.8, 40.1, 38.4, 37.3, 36.2, 33.5, 31.9, 29.1, 28.2, 28.1, 26.9, 25.1, 20.7, 17.9, 17.5.

Compound **12**: a white powder, 30 mg, yield 4.4%. HRESIMS: *m/z* 678.3203 [M+H]+ (calcd for C37H48N3O7S, 678.3168). 1H NMR (600 MHz, DMSO-*d6*) *δ*: 8.16 (1 H,s), 7.78 (1 H, d, *J* = 8.1 Hz), 7.60 (1 H, d, *J* = 7.7 Hz), 7.34 (1 H, t, *J* = 7.9 Hz), 6.41 (1 H, s), 6.34 (1 H, s), 5.37 (1 H, s), 5.32 (1 H, dd, *J* = 11.5, 4.0 Hz), 4.92 (1 H, s), 4.75 (1 H, s), 4.29 (1 H, t, *J* = 7.0 Hz), 4.13 (1 H, t, *J* = 4.9 Hz), 3.11 (1 H, m), 3.01 (1 H, m), 2.81 (1 H, dd, *J* = 12.4, 5.0 Hz), 2.61 (1 H, m), 2.57 (1 H, d, *J* = 12.4 Hz), 1.04 (3 H, s), 1.00 (3 H, s), 0.94 (3 H, s). 13C NMR (150 MHz, DMSO-*d*6) *δ*: 216.2, 205.7, 171.5, 165.2, 162.7, 147.5, 139.4, 130.6, 128.8, 124.2, 123.6, 119.9, 116.8, 74.8, 72.6, 61.6, 61.1, 59.2, 55.4, 53.1, 50.3, 48.6, 46.0, 39.9, 38.6, 37.2, 36.2, 33.3, 31.4, 28.2, 28.1, 27.4, 25.7, 25.1, 20.5, 18.5, 17.8.

Compound **13a**: a white powder, 102 mg, yield 15.1%. HRESIMS: *m/z* 678.3199 [M+H]+ (calcd for C37H48N3O7S, 678.3168). 1H NMR (600 MHz, DMSO-*d6*) *δ*:10.17 (1 H, s), 7.74 (2 H, d, *J* = 8.6 Hz), 7.64 (2 H, d, *J* = 8.6 Hz), 6.42 (1 H, s), 6.35 (1 H, s), 6.06 (1 H, s), 6.03 (1 H, s), 5.52 (1 H, s), 4.37 (1 H, d, *J* = 4.0 Hz), 4.31 (1 H, t, *J* = 5.9 Hz), 4.14 (1 H, d, *J* = 4.7 Hz), 3.97 (1 H, d, *J* = 11.8 Hz), 3.16 (1 H, s), 3.12 (1 H, m), 2.83 (1 H, dd, *J* = 12.4, 3.8 Hz), 2.59 (1 H, d, *J* = 12.4 Hz), 2.43 (1 H, m), 2.34 (2 H, t, *J* = 5.6 Hz), 1.18 (3 H, s), 1.01 (3 H, s), 0.98 (3 H, s). 13C NMR (150 MHz, DMSO-*d*6) *δ*: 216.6, 206.0, 172.1, 165.6, 163.1, 147.5, 143.7, 130.8×2, 125.4, 118.4×2, 116.8, 75.4, 71.5, 61.9, 61.5, 59.6, 55.8, 54.4, 51.0, 46.5, 44.4, 40.5, 38.8, 37.7, 36.7, 33.9, 32.3, 29.5, 28.7, 28.5, 27.4, 25.4, 21.2, 18.4, 17.9.

Compound **14a**: a white powder, 65 mg, yield 9.6%. HRESIMS: *m/z* 678.3155 [M+H]+ (calcd for C37H48N3O7S, 678.3168). 1H NMR (600 MHz, DMSO-*d6*) *δ*: 10.21 (1 H, s), 7.87 (2 H, d, *J* = 8.8 Hz), 7.67 (2 H, d, *J* = 8.8 Hz), 6.43 (1 H, s), 6.36 (1 H, s), 5.88 (1 H, s), 5.40 (1 H, s), 5.30 (1H, dd, *J* = 10.9, 4.7 Hz), 4.77 (1 H, s), 4.32 (1 H, t, *J* = 5.8 Hz), 4.14 (1 H,t, *J* = 4.8 Hz), 3.14 (1 H, m), 3.03 (1 H, s), 2.84 (1 H, dd, *J* = 12.4, 5.1 Hz), 2.65 (1 H, m), 2.59 (1 H, d, *J* = 12.4 Hz), 1.06 (3 H, s), 1.03 (3 H, s), 0.97 (3 H, s). 13C NMR (150 MHz, DMSO-*d*6) *δ*: 216.2, 205.7, 171.8, 164.8, 162.7, 147.5, 143.6, 130.5×2, 124.2, 118.0×2, 116.7, 74.4, 72.6, 61.6, 61.0, 59.2, 55.4, 53.0, 50.3, 46.1, 45.9, 40.4, 38.6, 37.2, 36.3, 33.3, 31.4, 30.8, 28.2, 28.1, 27.3, 24.9, 20.5, 18.5, 17.8.

Compound **13b**: a white powder, 169 mg, yield 21.0%. HRESIMS: *m/z* 692.3400 [M+H]+ (calcd for C38H50N3O7S, 692.3325). 1H NMR (600 MHz, DMSO-*d6*) *δ*: 9.30 (1 H, s), 7.63 (1 H, s), 7.57 (2 H, dd, *J* = 11.2, 9.4 Hz), 6.42 (1 H, s), 6.34 (1 H, s), 6.05 (1 H, s), 6.02 (1 H, s), 5.50 (1 H, s), 4.36 (1 H, d, *J* = 4.0 Hz), 4.30 (1 H, t , *J* = 6.7 Hz), 4.13 (1 H, t, *J* = 4.7 Hz), 3.95 (1 H, dd , *J* = 8.0, 3.7 Hz), 3.12 (1 H, m), 2.82 (1 H, dd , *J* = 12.4, 5.0 Hz), 2.57 (1 H, d, *J* = 12.4 Hz),2.19 (3 H, s), 1.16 (3 H, s), 0.99 (3 H, s), 0.96 (3 H, s). 13C NMR (150 MHz, DMSO-*d*6) *δ*: 216.1, 205.5, 171.4, 165.3, 162.7, 147.1, 140.6, 131.5, 130.3, 127.4, 126.6, 123.6, 116.4, 75.1, 71.0, 61.5, 61.1, 59.2, 55.4, 54.0, 50.6, 48.6, 46.1, 43.9, 39.9, 38.4, 37.3, 35.7, 33.5, 31.9, 29.1, 28.3, 28.1, 26.7, 25.2, 20.7, 18.0, 17.5.

Compound **14b**: a white powder, 45 mg, yield 6.5%. HRESIMS: *m/z* 692.3395 [M+H]+ (calcd for C38H50N3O7S, 692.3325). 1H NMR (600 MHz, DMSO-*d6*) *δ*: 9.32 (1 H, s), 7.78 (1 H, s), 7.72 (1 H, d, *J* = 8.3 Hz), 7.62 (1 H, d, *J* = 10.2 Hz), 6.42 (1 H, s), 6.35 (1 H, s), 5.87 (1 H, s), 5.39 (1 H, s), 5.31 (1 H, dd, *J* = 11.5, 3.9 Hz), 4.98 (1 H, d, *J* = 2.8 Hz), 4.76 (1 H, s), 4.31 (1 H, t, *J* = 7.1 Hz), 4.14 (1 H, t, *J* = 4.9 Hz), 3.13 (1 H, m), 3.03 (1 H, s), 2.83 (1 H, dd, *J* = 12.4, 5.1 Hz), 2.64 (1 H, m), 2.58 (1 H, d, *J* = 12.4 Hz), 2.38 (2 H, t, *J* = 6.9 Hz), 2.21 (3 H, s), 1.05 (3 H, s), 1.02 (3 H, s), 0.96 (3 H, s). 13C NMR (150 MHz, DMSO-*d*6) *δ*: 216.2, 205.6, 171.4, 164.9, 162.7, 147.5, 140.9, 131.7, 130.2, 127.5, 125.8, 123.4, 116.7, 74.4, 72.6, 61.6, 61.1, 59.2, 55.4, 53.0, 50.3, 46.1, 45.9, 39.9, 38.6, 37.2, 35.7, 33.3, 31.4, 28.2, 28.1, 27.3, 25.8, 25.2, 20.5, 18.5, 18.0, 17.8.

Compound **13c**: a white powder, 96 mg, yield 13.8%. HRESIMS: *m/z* 696.3119 [M+H]+ (calcd for C37H47FN3O7S, 696.3074). 1H NMR (600 MHz, DMSO-*d6*) *δ*: 9.90 (1 H, s), 8.10 (1 H, t, *J* = 8.0 Hz), 7.61 (1 H, d, *J* = 8.5 Hz), 7.54 (1 H, d, *J* = 11.4 Hz), 6.42 (1 H, s), 6.35 (1 H, s), 6.06 (1 H, s), 6.04 (1 H, s), 5.52 (1 H, s), 4.48 (1 H, d, *J* = 3.8 Hz), 4.31 (1H, t, *J* = 7.1 Hz), 4.13 (1 H, t, *J* = 4.9 Hz), 3.97 (1 H, d, *J* = 11.8 Hz), 3.17 (1 H, s), 3.11 (1 H, m), 2.82 (1 H, dd, *J* = 12.4, 5.1 Hz), 2.58 ( 1H, d, *J* = 12.4 Hz), 1.16 (3 H, s), 1.00 (3 H, s), 0.97 (3 H, s). 13C NMR (150 MHz, DMSO-*d*6) *δ*: 216.1, 205.40, 172.0, 164.3, 162.7, 152.8, 147.0, 130.7 (d, *J* = 14.4 Hz), 126.6 (d, *J* = 6.7 Hz), 125.8, 122.4, 116.6, 116.2 (d, *J* = 21.0 Hz), 75.4, 71.0, 61.5, 61.0, 59.2, 55.4, 54.0, 50.5, 46.1, 43.8, 39.9, 38.4, 37.3, 35.7, 33.4, 31.8, 29.0, 28.2, 28.1, 27.0, 25.0, 20.7, 17.9, 17.5.

Compound **14c**: a white powder, 64 mg, yield 9.2%. HRESIMS: *m/z* 696.3119 [M+H]+ (calcd for C37H47FN3O7S, 696.3074). 1H NMR (600 MHz, DMSO-*d6*) *δ*: 9.92 (1 H, s), 8.16 (1 H, t, *J* = 8.5 Hz), 7.75 (1 H, s), 7.73 (1 H, d, *J* = 4.5 Hz), 6.42 (1 H, s), 6.35 (1 H, s), 5.88 (1 H, s), 5.41 (1 H, s), 5.30 (1 H, dd, *J* = 10.8, 4.7 Hz), 5.12 (1 H, d, *J* = 2.6 Hz), 4.77 (1 H, s), 4.31 (1 H, t, *J* = 7.4 Hz), 4.14 (1 H, t, *J* = 5.0 Hz), 3.13 (1 H, m), 3.04 (1 H, s), 2.84 (1 H, dd, *J* = 12.4, 5.7 Hz), 2.65 (1 H, m), 2.59 (1 H, d, *J* = 12.4 Hz), 2.45 (2 H, m), 1.06 (3 H, s), 1.03 (3 H, s), 0.96 (3 H, s). 13C NMR (150 MHz, DMSO-*d*6) *δ*: 216.1, 205.6, 172.1, 163.9, 162.7, 152.8, 147.4, 131.1 (d, *J* = 11.4 Hz), 125.9, 125.8, 122.3, 116.8, 116.4 (d, *J* = 21.2 Hz), 74.7, 72.6, 61.5, 61.0, 59.2, 55.7, 55.4, 53.0, 50.3, 46.2, 46.0, 40.1, 38.6, 37.2, 35.8, 33.3, 31.4, 28.2, 28.1, 27.3, 24.9, 21.7, 20.5, 18.5.

**Compound 15**: a white powder, 212 mg, yield 35.9%. HRESIMS: *m/z* 591.2715 [M+H]+ (calcd for C30H43N2O8S, 591.2695). 1H NMR (600 MHz, DMSO-*d6*) *δ*: 6.38 (1 H, s), 6.33 (1 H, s), 5.98 (1 H, s), 5.88 (1 H, d, *J* = 10.3 Hz), 5.82 (1 H, s), 5.82 (1 H, s), 5.59 (1 H, s), 4.38 (1 H, d, *J* = 4.9 Hz), 4.11 (1 H, t, *J* = 4.9 Hz), 4.06 (1 H, d, *J* = 10.2 Hz), 3.82 (1 H, d, *J* = 10.2 Hz), 3.50 (1 H, dd, *J* = 10.2, 7.0 Hz), 3.05-3.07 (1 H, m), 2.95 (1 H, d, *J* = 9.7 Hz), 2.81 (1 H, dd, *J* = 12.5, 5.1 Hz), 2.56 (1 H, d, *J* = 12.4 Hz), 0.98 (3 H, s), 0.97 (3 H, s). 13C NMR (150 MHz, DMSO-*d*6) *δ*: 207.6, 172.0, 163.2, 151.3, 119.8, 96.2, 74.5, 73.6, 72.0, 62.9, 62.2, 61.5, 59.6, 59.5, 55.8, 54.3, 41.8, 40.9, 40.3, 38.8, 34.2, 33.8, 33.2, 30.7, 29.8, 28.4 × 2, 24.5, 22.1, 20.2.

**Compound 16**: a white powder, 78 mg, yield 13.2%. HRESIMS: *m/z* 591.2735 [M+H]+ (calcd for C30H43N2O8S, 591.2695). 1H NMR (400 MHz, DMSO-*d6*) *δ*: 6.38 (1 H, s), 6.35 (1 H, s), 6.33 (1 H, s), 5.75 (1 H, s), 5.70 (1 H, s), 5.31 (1 H, s), 4.99 (1 H, s), 4.93 (1 H, d, *J* = 6.2 Hz), 4.51 ( 1H, d, *J* = 5.0 Hz), 4.25 ( 2 H, m), 4.10 (2 H, m), 3.90 (1 H, d, *J* = 10.4 Hz), 3.04 (1 H, m), 2.88 (1H, d, *J* = 8.9 Hz), 2.78 (1 H, dd, *J* = 12.4, 5.1 Hz), 0.99 (3 H, s), 0.70 (3 H, s). 13C NMR (100 MHz, DMSO-*d*6) *δ*: 199.7, 173.0, 162.8, 151.0, 115.9, 95.9, 75.3, 73.6, 71.0, 63.1, 61.1, 61.0, 60.0, 59.2, 55.5, 55.4, 41.0, 40.4, 37.7, 34.0, 33.7, 33.2, 31.4, 28.2, 28.1, 27.9, 24.3, 21.1, 19.0.

Compound **17**: a white powder, 51 mg, yield 8.9%. 1H NMR (400 MHz, DMSO-*d6*) *δ*: 10.2 (1 H, s), 7.94 (2 H, d, *J* = 8.7 Hz), 7.68 (2 H, d, *J* = 8.7 Hz), 6.42 (1 H, s), 6.35 (1 H, s), 5.20 (1 H, d, *J* = 7.2 Hz), 5.00 (1 H, s), 4.88 (1 H, s), 4.51 (1 H, s), 4.41 (1 H, s), 4.34 (1 H, s), 4.28 (1 H, t, *J* = 7.4 Hz), 4.10-4.12 (1 H, m), 3.07-3.09 (1 H, m), 2.81 (1 H, dd, *J* = 12.4, 5.0 Hz), 2.60-2.62 (1 H, m), 2.31-2.33 (2 H, m), 1.01 (3 H, s), 0.92 (6 H, s). 13C NMR (100 MHz, DMSO-*d*6) *δ*: 216.8, 171.8, 165.2, 162.8, 157.4, 143.6, 130.6 × 2, 124.5, 118.2 × 2, 106.2, 75.7, 73.7, 71.2, 61.1, 59.2, 55.5, 54.1, 50.7, 48.8, 47.1, 45.9, 40.5, 38.5, 37.8, 36.3, 33.5, 32.8, 28.3, 28.1, 27.6, 25.0, 20.6, 18.6, 17.6.

Figure S1. HR-ESI-MS of Compound 1

Figure S2. 1H NMR of Compound 1

Figure S3. 13C NMR of Compound 1

Figure S4. HR-ESI-MSof Compound 2

Figure S5. 1H NMR of Compound 2

Figure S6. 13C NMR of Compound 2

Figure S7. HR-ESI-MSof Compound 3

Figure S8. 1H NMR of Compound 3

Figure S9. 13C NMR of Compound 3

Figure S10. HR-ESI-MSof Compound 4a

Figure S11. 1H NMR of Compound 4a

Figure S12. 13C NMR of Compound 4a

Figure S13. HR-ESI-MSof Compound 4b

Figure S14. 1H NMR of Compound 4b

Figure S15. 13C NMR of Compound 4b

Figure S16. 1H NMR of Compound 4c

Figure S17. 13C NMR of Compound 4c

Figure S18. HR-ESI-MSof Compound 5

Figure S19. 1H NMR of Compound 5

Figure S20. 13C NMR of Compound 5

Figure S21. HR-ESI-MSof Compound 6

Figure S22. 1H NMR of Compound 6

Figure S23. 13C NMR of Compound 6

Figure S24. HR-ESI-MSof Compound 7

Figure S25. 1H NMR of Compound 7

Figure S26. 13C NMR of Compound 7

Figure S27. HR-ESI-MSof Compound 8

Figure S28. 1H NMR of Compound 8

Figure S29. 13C NMR of Compound 8

Figure S30. HR-ESI-MSof Compound 9

Figure S31. 1H NMR of Compound 9

Figure S32. 13C NMR of Compound 9

Figure S33. HR-ESI-MSof Compound 10

Figure S34. 1H NMR of Compound 10

Figure S35. 13C NMR of Compound 10

Figure S36. HR-ESI-MSof Compound 11

Figure S37. 1H NMR of Compound 11

Figure S38. 13C NMR of Compound 11

Figure S39. HR-ESI-MSof Compound 12

Figure S40. 1H NMR of Compound 12

Figure S41. 13C NMR of Compound 12

Figure S42. HR-ESI-MSof Compound 13a

Figure S43. 1H NMR of Compound 13a

Figure S44. 13C NMR of Compound 13a

Figure S45. HR-ESI-MSof Compound 14a

Figure S46. 1H NMR of Compound 14a

Figure S47. 13C NMR of Compound 14a

Figure S48. HR-ESI-MSof Compound 13b

Figure S49. 1H NMR of Compound 13b

Figure S50. 13C NMR of Compound 13b

Figure S51. HR-ESI-MSof Compound 14b

Figure S52. 1H NMR of Compound 14b

Figure S53. 13C NMR of Compound 14b

Figure S54. HR-ESI-MSof Compound 13c

Figure S55. 1H NMR of Compound 13c

Figure S56. 13C NMR of Compound 13c

Figure S57. HR-ESI-MSof Compound 14c

Figure S58. 1H NMR of Compound 14c

Figure S59. 13C NMR of Compound 14c

Figure S60. HR-ESI-MSof Compound 15

Figure S61. 1H NMR of Compound 15

Figure S62. 13C NMR of Compound 15

Figure S63. HR-ESI-MSof Compound 16

Figure S64. 1H NMR of Compound 16

Figure S65. 13C NMR of Compound 16

Figure S66. 1H NMR of Compound 17

Figure S67. 13C NMR of Compound 17
